1 **An autosomal dominant cardiac arrhythmia syndrome, ST Depression**  
2 **Syndrome, is caused by the *de novo* creation of a cardiomyocyte enhancer.**

3

4 Carin P. de Villiers<sup>1†</sup>, Damien J. Downes<sup>2†</sup>, Anuj Goel<sup>1,3</sup>, Alistair T. Pagnamenta<sup>3</sup>, Elizabeth  
5 Ormondroyd<sup>1</sup>, Alexander J. Sparrow<sup>1</sup>, Svanhild Nornes<sup>4,5</sup>, Edoardo Giacomuzzi<sup>3,6</sup>, Phalguni  
6 Rath<sup>3</sup>, Ben Davies<sup>3</sup>, Ron Schwessinger<sup>2,7</sup>, Matthew E. Gosden<sup>2</sup>, Robert A. Beagrie<sup>3,8</sup>,  
7 Duncan Parkes<sup>3</sup>, Rob Hastings<sup>1</sup>, Stefano Lise<sup>3,9</sup>, Silvia Salatino<sup>3</sup>, Hannah  
8 Roberts<sup>3</sup>, Maria Lopopolo<sup>3</sup>, Carika Weldon<sup>3</sup>, Amy Trebes<sup>3</sup>, The WGS500 consortium<sup>10</sup>,  
9 David Buck<sup>3</sup>, Jenny C. Taylor<sup>3</sup>, Charles Redwood<sup>1</sup>, Edward Rowland<sup>11</sup>, Dushen  
10 Tharmaratnam<sup>12</sup>, Graham Stuart<sup>13</sup>, Pier D. Lambiase<sup>11</sup>, Sarah De Val<sup>4,5</sup>, Jim R. Hughes<sup>2,7\*</sup>,  
11 Hugh Watkins<sup>1,3\*</sup>

12

13 † These authors contributed equally: Carin P. de Villiers & Damien J. Downes.

14 \* Corresponding authors: [hugh.watkins@rdm.ox.ac.uk](mailto:hugh.watkins@rdm.ox.ac.uk), [jim.hughes@imm.ox.ac.uk](mailto:jim.hughes@imm.ox.ac.uk)

15

16 **Affiliations:**

17 1 Division of Cardiovascular Medicine, Radcliffe Department of Medicine, University of  
18 Oxford, Oxford, UK

19 2 MRC Molecular Haematology Unit, MRC Weatherall Institute of Molecular Medicine,  
20 Radcliffe Department of Medicine, University of Oxford, Oxford, UK

21 3 Centre for Human Genetics, University of Oxford, Oxford, UK

22 4 Ludwig Institute for Cancer Research Ltd, Nuffield Department of Medicine,  
23 University of Oxford, Oxford, UK

24 5 Department of Physiology, Anatomy and Genetics, University of Oxford, Oxford, UK

25 6 Human Technopole, Milan, Italy

26 7 MRC WIMM Centre for Computational Biology, MRC Weatherall Institute of  
27 Molecular Medicine, Radcliffe Department of Medicine, University of Oxford, Oxford,  
28 UK

29 8 Laboratory of Gene Regulation, MRC Weatherall Institute of Molecular Medicine,  
30 Radcliffe Department of Medicine, University of Oxford, Oxford, UK

31 9 University College London Cancer Institute, London, UK

32 10 Contributors listed at the end of the manuscript

33 11 St Bartholomew's Hospital, Barts Health NHS Trust, London, UK and UCL Institute of  
34 Cardiovascular Science, University College London, London, UK

35 12 Royal Devon University Healthcare NHS Foundation Trust

36 13 Bristol Heart Institute, Bristol, United Kingdom

37

38

39 **Keywords:** Enhancer, KCNB1, ECG, ST-segment, Arrhythmia, Mendelian disease,

40 gene regulation, machine learning

41 **Abstract**

42 A substantial proportion of mutations underlying rare Mendelian diseases remain unknown,  
43 potentially because they lie in the non-coding genome. Here, we report the mapping of the  
44 causal mutation of an autosomal dominant cardiac arrhythmia syndrome, ST Depression  
45 Syndrome, which is associated with widespread ST-depression on the electrocardiogram  
46 together with risk of sudden death and heart failure, to the non-coding region of the *KCNB1*  
47 locus. Using genetic linkage analysis, we narrowed the associated region to 1cM of the  
48 genome and then with a genome editing approach, we show that the mutation, a small  
49 complex insertion-deletion, generates a *de novo* gain-of-function enhancer that drives higher  
50 expression of *KCNB1* in cardiomyocytes. This is the first report of a gain of *de novo*  
51 enhancer function causing Mendelian disease. Critically, the tissue-specific gain-of-function  
52 regulatory change could be predicted using a deep neural network. Application of a similar  
53 framework will enable identification of causal non-coding mutations and affected genes in  
54 other rare diseases.

## 55 Introduction

56

57 In the last decade, advances in sequencing technologies have produced a wealth of data for  
58 understanding the causes of Mendelian disease, however, variant interpretation and  
59 identification of disease-causing mutations is still incomplete. Current approaches detect a  
60 pathogenic variant in only a third of patients with suspected genetic disease<sup>1-4</sup>, with the vast  
61 majority of them located in the coding part of the genome. Candidate gene panels, whole  
62 exome sequencing (WES), and certain bioinformatic variant filtering approaches using whole  
63 genome sequencing (WGS) data<sup>5</sup>, still frequently miss or disregard non-coding variants. This  
64 is partly due to a huge gap in knowledge concerning these parts of the genome. However,  
65 just as the majority of common disease variants are thought to affect regulatory, rather than  
66 coding sequence<sup>6</sup>, there are likely to be a number of primary disease-causing mutations  
67 affecting non-coding regulatory elements that are currently going undetected<sup>7</sup>. Additionally,  
68 within efforts to define disease-causing non-coding variants, most emphasis is on detecting  
69 variants that disrupt annotated regulatory elements, with few efforts directed at detecting  
70 newly created elements and gain-of-function changes. Bridging this gap in knowledge  
71 requires better understanding of the mechanisms of non-coding mutations underlying  
72 heritable disease, along with improved tools to predict and characterise these changes.

73

74 We previously reported a novel inherited cardiac arrhythmia syndrome with widespread ST-  
75 segment depression on the electrocardiogram (ECG), termed here ST Depression  
76 Syndrome (STDS)<sup>8</sup>. This syndrome is inherited in an autosomal dominant manner and  
77 predisposes affected individuals to life-threatening arrhythmias; however, the primary  
78 disease-causing mutation remained unknown<sup>9</sup>. Genome-wide association studies (GWAS)  
79 for variation in ECG segments, including the PR<sup>10</sup>, QRS<sup>11</sup>, QT<sup>12,13</sup> and ST<sup>14</sup> intervals, have  
80 all highlighted the role of non-coding variants in the electrophysiology of the heart. Here we  
81 report a rare non-coding mutation, shared as a founder allele by affected STDS families, as  
82 the underlying genetic cause of this novel cardiac arrhythmia syndrome. By applying a  
83 machine-learning, genome-engineering and multi-omics approach developed for the  
84 deciphering of GWAS variants<sup>15,16</sup>, we show that the causal mutation, a complex insertion-  
85 deletion, repurposes the sequence of a skeletal muscle enhancer to generate a *de novo*  
86 gain-of-function cardiomyocyte enhancer that drives increased expression in the heart of the  
87 nearby potassium voltage-gated channel encoding gene, *KCNB1*. To our knowledge, this is  
88 the first report of a *de novo* enhancer causing Mendelian disease.

## 89 **Results**

90

### 91 **Clinical findings in families with ST-depression on the ECG**

92 A total of 14 individuals from five UK families (Fig. 1b) were identified as having autosomal  
93 dominant ST Depression Syndrome (STDS) (Fig. 1a). Family 1 was described in the original  
94 report of this syndrome (Family B in reference 8), with widespread ST-segment depression  
95 on the ECG, starting in childhood then stable through life, with incidences of ventricular  
96 arrhythmia resulting in cardiac arrest, and atrial fibrillation (AF) and ventricular contractile  
97 impairment developing in later life. The proband of Family 2, IV-4, presented with ventricular  
98 arrhythmia in mid-adult life and was noted to have widespread ST-segment depression; an  
99 implantable cardioverter-defibrillator (ICD) was implanted when she was in her early thirties.  
100 In her 50s and 60s she received multiple ICD shocks for symptomatic polymorphic  
101 ventricular tachycardia. She died in her early 60s with severe left ventricular (LV) systolic  
102 impairment with an ejection fraction of 10%. Two distant relatives, both in their 30s, were  
103 found to have the same ECG phenotype: the ECG features were found in IV:1 when he was  
104 investigated for chest pain but found to have normal coronary arteries and then in IV:2, who  
105 has no symptoms, on family screening. Neither have had significant arrhythmias. Their  
106 father (III:1) died in his mid 60s, with 'abnormal ECG' noted in clinical records but no other  
107 information available. The proband of Family 3, also in his 30s, had the abnormal ECG  
108 features detected during an insurance medical, had a structurally normal heart and no  
109 arrhythmias. His mother had died suddenly in her early 70s with a history of AF, dilated  
110 cardiomyopathy and ST-segment depression reported on her ECG. The proband in Family 4  
111 presented with syncope as a young adult and was found to have the typical ECG changes of  
112 widespread, persistent ST-segment depression. Cardiac MRI was normal and no arrhythmia  
113 has been documented on an implanted loop recorder. Her mother died suddenly in her early  
114 50s with a clinical record of "sudden cardiac death" but no post-mortem analysis. The  
115 proband in Family 5 presented with paroxysmal AF in her 50s. Her sinus rhythm ECGs  
116 showed fixed changes typical of familial STDS. Her CT coronary angiogram demonstrated  
117 no coronary artery disease, and subsequent cardiac MRI was normal. Her daughter has an  
118 identical ECG and is asymptomatic with normal cardiac MRI.

119

### 120 **Distantly related families with a shared disease locus in a small segment on** 121 **chromosome 20**

122 To identify regions of interest, independent linkage analyses were performed for each of the  
123 two larger families, using data generated from single nucleotide polymorphism (SNP) arrays

124 (Family 1: II:1, II:3, II:5, III:1, III:3, III:4, III:5, III:6, IV:1 and IV:2, Family 2: III:5, IV:4, IV:5 and  
125 V:1) and WGS (Family 2: IV:1). For Family 1, two regions of the genome on chromosomes  
126 12 and 20 showed complete linkage (LOD = 2.41) with ST-segment depression (Fig. 2a,  
127 Supplementary Table 1); all other chromosomal regions were excluded with LOD < -2.0.  
128 Family 2 did not share the linkage region on chromosome 12, but an overlapping region  
129 showing perfect segregation (hg38, chr20:48,212,554-50,048,337, LOD = 1.52) was  
130 detected on chromosome 20 (Fig. 2a, Supplementary Table 1), indicating that these two  
131 families likely share a single causative locus.

132

133 To explore the possibility that these two STDS families could be distantly related we next  
134 examined informative SNPs from the array genotyping to define the haplotypes segregating  
135 with disease in the regions of complete linkage in each of Family 1 and 2. In Family 1, this  
136 revealed a 6.29 Mbp (10.74cM) segment carried by each of the 7 affected members and not  
137 carried by the unaffected family members (Fig. 2b, Supplementary Fig. 1a,b). In Family 2,  
138 haplotype analysis revealed a 1.01 Mbp (1.02 cM) region similarly showing complete linkage  
139 with STDS, delimited by recombination events within the family (Fig. 2b, Supplementary Fig.  
140 1c,d). The haplotypes in this shared region of complete linkage were identical in Family 1  
141 and Family 2.—Inspection of this haplotype shows that it is rare, carried by 0.006% of  
142 European ancestry individuals in UKBiobank (Supplementary Fig. 2). Thus, this finding  
143 provides robust evidence that this sharing has not arisen by chance, but rather Family 1 and  
144 2 are distantly related, i.e. share a common ancestor, such that this shared region is  
145 identical-by-descent (IBD). Confirmation of a shared IBD region allows linkage data from the  
146 two families to be combined for estimation of minimal LOD score; this gives a combined  
147 LOD of 4.26 (Fig. 2a).

148

149 In Family 3, whole genome sequence data was available on the proband, but not SNP array  
150 data. Genotypes were therefore extracted for informative SNPs in the linkage region on  
151 chromosome 20. This revealed an ~ 4.3 Mbp segment in which the disease-associated  
152 allele in the risk haplotype in Family 1 was always present in the Family 3 proband's  
153 genotype. To estimate the probability that this might have arisen by chance, we examined  
154 SNPs not in LD with one another across this region and calculated the combined likelihood  
155 of carriage of at least one copy of the relevant allele. This showed that the probability that  
156 this might have arisen by chance in less than  $2.3 \times 10^{-05}$ , again indicating that this segment  
157 has been passed down IBD from a common ancestor. Taken together these analyses  
158 indicate that the disease locus in these families lies on chromosome 20 within the small  
159 ~1Mbp region defined by the extent of the IBD segment and haplotype shared by all three.

160

161 **Affected family members share a single non-coding variant**

162 Variant calling and quality-based filtering with Platypus<sup>17</sup>, using whole genome sequence  
163 data for the six affected individuals from families 1, 2 and 3, resulted in an aggregated  
164 dataset containing 6,926,029 variants (6,133,943 SNPs and 792,086 indels). Of these  
165 variants, there were 22 novel heterozygous variants shared by the 6 selected affected  
166 individuals that were absent from both the general population (gnomAD and 1000G) and the  
167 control cohort (Supplementary Table 2). None of these variants affected coding sequence  
168 and only one was in the region defined by genetic linkage and the extended area of IBD and  
169 haplotype sharing. This variant was a single, small, complex deletion and insertion located in  
170 the ~1Mbp shared region on chromosome 20 and carried on the shared affected haplotype  
171 (see Supplementary Table 3): NC\_000020.11: g.49356862-49356878delinsTCCC, i.e.  
172 comprising loss of 17 residues and gain of four others, referred to hereafter as delinsTCCC  
173 (Fig. 3). The delinsTCCC variant was absent in all databases searched, including gnomAD  
174 and the 100KGP project.

175

176 Sanger sequencing was used to confirm that this variant was absent in unaffected relatives  
177 (n=4, Family 1: III:6, Family 2: III:5, IV:5 and V:1) and present in all affected cases from  
178 families 1, 2 and 3 (n=12, Family 1: II:1, II:3, III:3, III:4, III:5, IV:1 and IV:2, Family 2: IV:1,  
179 IV:2 and IV:4, Family 3: II:1). Finally, Sanger sequencing revealed that the same  
180 delinsTCCC was present in both probands from the two additional families subsequently  
181 ascertained, Families 4 & 5.

182

183 **In silico analysis of the delinsTCCC variant**

184 The delinsTCCC variant lies in a highly conserved intergenic region of the genome, 6,999 bp  
185 downstream of the nearest annotated gene, the potassium channel encoding gene *KCNB1*  
186 (Fig. 3) and 78.8 kbp upstream of the nearest transcription start site (*ZNFX1*). Given the  
187 non-coding location of this variant we reasoned this region could play a role in transcriptional  
188 regulation of genes influencing the ST-segment. Consistent with this hypothesis, it is  
189 positioned within 50 kbp of two independent sentinel SNPs identified by a GWAS for ST-  
190 segment amplitude<sup>14</sup> (Fig. 4 and Supplementary Dataset 1). Application of a platform  
191 designed to decode GWAS signals<sup>15,16</sup> by considering regulatory, splicing and coding  
192 mechanisms, attributed these signals to two moderately linked candidate causal variants  
193 (rs6012624, rs6019764,  $r^2$ : 0.715 [EUR]), which both lie in open chromatin in  
194 cardiomyocytes. Using a deep convolutional neural network (CNN)<sup>15,18</sup> trained to predict cell  
195 type-specific chromatin activity from sequence we predicted that both GWAS variants alter

196 chromatin accessibility in cardiomyocytes (Supplementary Dataset 1). Published low-  
197 resolution (20 kbp) chromosome conformation capture (3C) Hi-C data from cardiomyocytes  
198 differentiated from induced pluripotent stem cells (iPSC) and embryonic stem cells (ESC)<sup>19</sup>  
199 shows that one of the predicted causal GWAS variants and the delinsTCCC variant lie in a  
200 region of chromatin that interacts with the *KCNB1* promoter, but not the *ZNF1* promoter  
201 (Fig. 4a). These results suggest that altered gene regulation at this locus can affect the ST-  
202 segment and may be responsible for STDS.

203

204 Given the sequence conservation surrounding the delinsTCCC variant and the nearby  
205 predicted regulatory GWAS SNPs, we investigated Assay for Transposase-Accessible  
206 Chromatin-sequencing (ATAC-seq) data from ESC derived cardiomyocyte progenitors<sup>19</sup> and  
207 iPSC derived cardiomyocytes from unaffected individuals<sup>20</sup>, and single cell ATAC-seq  
208 (scATAC-seq) from developing embryonic heart<sup>21</sup> for the presence of open chromatin, which  
209 is associated with enhancers. This analysis revealed that the delinsTCCC site does not lie in  
210 a region of open chromatin in cardiac cells (Fig. 4a and Fig. 5a) with the nearest open  
211 chromatin located ~12 kbp upstream; given the Hi-C chromatin structure we named this site  
212 E-139 as it is a putative enhancer and 139 kbp from the *KCNB1* promoter (Fig. 5a,  
213 Supplementary Fig. 3). A broader survey of 95 ENCODE DNase1-seq open chromatin  
214 datasets<sup>22,23</sup> and 126 developmental scATAC-seq datasets<sup>21</sup> shows this region is accessible  
215 in skeletal muscle cells and multiple carcinomas (Supplementary Fig. 4) and is designated  
216 as a distal enhancer like sequence by ENCODE. Recent work has shown how sequence  
217 changes in enhancers can lead to loss of tissue-specificity by optimizing transcription factor  
218 binding affinity; including for cardiac enhancers that regulate ECG traits<sup>24,25</sup>. Given the  
219 chromatin accessibility in non-cardiac muscle cells and the nearby ST-segment GWAS  
220 signal we hypothesized delinsTCCC may lead to a change in enhancer tissue-specificity, to  
221 generate a cryptic *de novo* cardiomyocyte enhancer. Supportive of this hypothesis, the  
222 predictions from the deep CNN found that delinsTCCC had the potential to increase  
223 chromatin accessibility in cardiomyocytes and smooth muscle cells but not in carcinomas  
224 (Fig. 5b, Supplementary Fig. 5). *In silico* mutagenesis of each base pair across the  
225 delinsTCCC region showed that a TCCC motif (Fig. 5c), corresponding to several  
226 transcription factor families, was important for the predicted gain in accessibility. Consistent  
227 with binding-affinity optimization, both ETS and NFKB showed stronger motif matches to the  
228 variant sequence than to reference sequence; whereas the E2F motif is only found in the  
229 variant sequence (Fig. 5d). These findings strengthen the evidence for this disease-causing  
230 variant while supporting the hypothesis for a *de novo* cardiomyocyte enhancer.

231



### 232 **delinsTCCC generates a cardiac enhancer**

233 To test if delinsTCCC generates an open chromatin site in human cardiomyocytes, we  
234 generated iPSC lines (Supplementary Fig. 6) heterozygous for the delinsTCCC variant using  
235 CRISPR-Cas9 genome editing (Supplementary Fig. 7). ATAC-seq in cardiomyocytes  
236 differentiated from these iPSC showed the presence of a *de novo* open chromatin element  
237 which contained the delinsTCCC variant (Fig. 5a). Allelic analysis of reads in this region  
238 indicated that over 84% of the reads came from the mutated allele, implying that the peak  
239 was specific to the delinsTCCC sequence (Supplementary Fig. 7). Relative levels of histone  
240 H3 lysine-4 mono- and tri-methylation (H3K4me1, H3K4me3) can be used to distinguish  
241 enhancers and promoters<sup>26</sup>. We performed Cleavage Under Targets and Release Using  
242 Nuclease (CUT&RUN)<sup>27</sup> for both H3K4me1, which is primarily at enhancers, and H3K4me3,  
243 which is primarily at promoters, in the heterozygous mutant cardiomyocyte cells. Higher  
244 levels of H3K4me1 relative to H3K4me3 were detected at the *de novo* element and E-139  
245 (Fig. 5a, Supplementary Fig. 8), consistent with ENCODE ChIP-seq for these marks in  
246 smooth muscle cells (Supplementary Fig. 4), indicating that they are both likely to be  
247 enhancers.

248

249 To determine if the delinsTCCC sequence and the E-139 element function as enhancers we  
250 placed each, as well as the equivalent wild-type sequence for the delinsTCCC site (WT),  
251 separately upstream of the silent E1b minimal promoter and a GFP reporter gene and  
252 generated Tol2-induced transgenic zebrafish embryos. Both the *tg(E-139:GFP)* and the  
253 *tg(delinsTCCC:GFP)* transgenic fish showed strong GFP expression in the heart, spread  
254 throughout the ventricles in a fairly consistent manner (Fig. 6a,b, Supplementary Table 4).  
255 By comparison, the *tg(WT:GFP)* transgenic fish displayed low or negligible GFP expression  
256 in this region. Expression in certain other parts of the fish (e.g. the eye) was in keeping with  
257 commonly observed autofluorescence (Supplementary Fig. 9).

258

259 In addition to the heart, the *tg(E-139:GFP)* fish also displayed strong expression in other  
260 parts of the fish including the head (Fig. 6c, Supplementary Fig. 10). Consistently, E-139  
261 was accessible in numerous cerebrum cell-types in ATAC-seq from developing human  
262 brains<sup>21</sup> (Supplementary Fig. 3). This is interesting as the closest gene, *KCNB1*, is known to  
263 play a significant role in the brain<sup>28</sup>. Therefore, while the E-139 element appears to be  
264 involved in more ubiquitous expression, the delinsTCCC variant seems to specifically drive  
265 gene expression in the heart.

266

### 267 **delinsTCCC drives higher *KCNB1* expression in cardiomyocytes**

268 To identify the target gene(s) of the *de novo* delinsTCCC enhancer, we generated high-  
269 resolution 3C interaction profiles for the three closest active genes (*KCNB1*, *ZNFX1*, *PTGIS*)  
270 with nuclear-titrated Capture-C<sup>29</sup> using wild-type and heterozygous delinsTCCC iPSC  
271 derived cardiomyocytes. Capture-C from the *KCNB1* promoter in the wild-type cells showed  
272 strong interaction with E-139 and a proximal CTCF site (C-150) situated 150 kbp upstream  
273 of the promoter (Fig. 7). Neither *ZNFX1* nor *PTGIS* showed strong interaction with this  
274 region (Supplementary Fig. 11). Capture-C from *KCNB1* in heterozygous delinsTCCC cells,  
275 showed significantly higher levels of interaction with fragments covering E-139 compared to  
276 the wild-type cells (Fig. 7; two-sided Wilcoxon matched-pairs signed rank test,  $p < 0.0001$ ). To  
277 exclude the possibility that these elements interact with more distal genes, we next  
278 performed Capture-C experiments from both the delinsTCCC enhancer and E-139. The  
279 delinsTCCC site did not show a strong interaction with the *KCNB1* promoter, nor any other  
280 promoter, in either wild-type or heterozygous cells. The E-139 enhancer interacted  
281 specifically with the *KCNB1* promoter and the level of interaction was significantly increased  
282 in the presence of the delinsTCCC allele (two-sided Wilcoxon matched-pairs signed rank  
283 test,  $p = 0.0094$ ).

284

285 Finally, to determine whether the increased E-139/*KCNB1* interaction in the presence of the  
286 delinsTCCC variant led to higher gene expression, we performed quantitative real-time PCR  
287 experiments using iPSC derived cardiomyocytes. Three independent heterozygous clones  
288 (C6, C68 and C93), each with multiple differentiations, collectively showed markedly  
289 increased *KCNB1* expression (two-sided Mann-Whitney test,  $p = 0.0015$ ) (Fig. 8a).

290

291 To investigate differences in allelic expression, we identified a SNP (rs2229006) within the  
292 coding sequence of *KCNB1* (exon 2, NM\_004975.4) that was heterozygous in the parental  
293 iPSC cell line. By combining public phase data and Nanopore sequencing we determined  
294 that the variant allele, rs2229006-C, was in *cis* with the edited delinsTCCC allele in clone C6  
295 (Supplementary Fig. 12). RNA sequencing showed a bias for *KCNB1* transcripts arising from  
296 the chromosome containing the delinsTCCC variant, with the rs2229006-C allele being 3.8-  
297 fold more abundant than the reference rs2229006-G allele (Supplementary Table 5). These  
298 findings corroborate a mechanism whereby a *de novo* enhancer, created by the delinsTCCC  
299 variant, leads to cardiac specific *KCNB1* upregulation through an increased interaction  
300 between E-139 and the *KCNB1* promoter (Fig. 8b).

## 301 Discussion

302

303 We have utilised a multi-omics, genome engineering and machine learning<sup>15,16</sup> approach to  
304 identify and characterise a novel gain-of-function non-coding disease-causing variant  
305 responsible for a recently described cardiac arrhythmia syndrome, STSD<sup>8,30</sup>. This syndrome  
306 is associated with widespread ST-segment depression on the ECG and predisposes  
307 affected individuals to cardiac events including sudden cardiac death and heart failure. The  
308 responsible variant, delinsTCCC, generates a cryptic cardiomyocyte enhancer which drives  
309 higher expression of the potassium channel encoding gene, *KCNB1*.

310

311 Cardiac arrhythmia syndromes are most commonly associated with variants in ion channel  
312 genes<sup>31</sup>. Consistent with this, the causal variant identified in this study enhances the  
313 expression in the heart of the *KCNB1*-encoded, pore-forming subunit of the voltage-gated  
314 potassium channel Kv2.1. This channel acts as a delayed rectifier, propagating current in a  
315 wide range of electrically active cell types across many organ systems. Kv2.1 plays an  
316 important role in the repolarisation phase of the action potential in rodent hearts<sup>32,33</sup>, is  
317 expressed in human atrial<sup>34-36</sup> and ventricular cells<sup>35,36</sup>, and binds ion channel beta-subunits  
318 from the KCNE family<sup>37</sup> known to contribute to other cardiac arrhythmia syndromes such as  
319 the Long-QT syndrome<sup>38,39</sup>. However, rather than causing cardiac disease, pathogenic  
320 *KCNB1* coding variants have been shown to cause neurological disorders, specifically forms  
321 of developmental and epileptic encephalopathy<sup>40</sup>. Much attention has been devoted to the  
322 study of Kv2.1 in the human brain, largely due to its high expression in this region<sup>41</sup>.  
323 Interestingly, our study identified the regulatory element proximal to the delinsTCCC  
324 enhancer, E-139, as an interactor of the *KCNB1* gene promoter and we confirm its ability of  
325 driving reporter gene expression in zebrafish brain. The broad clinical spectrum of subjects  
326 with different *KCNB1* variants emphasises the cell-type specific impact of regulatory  
327 changes which determine which organs are affected, and hence the phenotypes of these  
328 inherited conditions.

329

330 The hallmark phenotype of resting ST-segment depression on the surface ECG in STDS  
331 implies transmural heterogeneity of currents underlying the cardiac action potential, thereby  
332 creating a transmural gradient (analogous to the ST-segment shifts seen acutely in the  
333 context of subendocardial ischaemia or myocardial infarction)<sup>42,43</sup>. Therefore, we  
334 hypothesise that the delinsTCCC enhancer results in differential increases in *KCNB1*  
335 expression, and hence Kv2.1 activity, in different layers of the myocardium – a property  
336 commonly associated with cardiac ion channels<sup>44</sup>. A shorter endocardial action potential,

337 induced by an endocardial increase in expression of the Kv2.1 channel, would promote  
338 current flow from epicardial sites with longer action potentials to generate ST depression on  
339 the surface ECG. This is the inverse of the gradient seen in Brugada Syndrome which  
340 promotes localised ST elevation associated with different transmural action potential  
341 durations where the epicardial action potential duration is relatively short<sup>45,46</sup>. These  
342 gradients require electrotonic uncoupling to be maintained. Indeed, the fact that the ST  
343 depression develops 80ms after the J point would be compatible with such differences  
344 developing in phase 3 and 4 of the action potential when Kv2.1 is active. Such gradients set  
345 up potential sites for phase 2 re-entry following an ectopic beat initiating the polymorphic  
346 ventricular arrhythmias described in this rare familial condition<sup>47</sup>.

347

348 The delinsTCCC variant underlying STDS adds to the growing knowledge of non-coding  
349 regulatory variants associated with ECG traits. Previous reports, including a number of  
350 GWAS<sup>10-14</sup>, have identified non-coding regions important for the ST<sup>14</sup>, QT<sup>12,13,48-50</sup>, PR<sup>10,51-53</sup>  
351 and QRS<sup>11,51-53</sup> intervals. However, identifying specific target genes and their associated  
352 functional effects is still a huge challenge. This has limited the detection and inclusion of  
353 pathogenic non-coding variants in clinical practice. Furthermore, while pairing genes to their  
354 regulatory elements can be carried out using a combination of chromosome conformation  
355 capture techniques<sup>54</sup> and open chromatin atlases<sup>21</sup>, these methods are of little use for the  
356 identification of *de novo* enhancer variants. Therefore, our study highlights the value of  
357 combining these rich resources with ongoing 'classic' family studies, cellular models and  
358 machine learning to improve non-coding variant detection and validation.

359

360 Gain-of-function mechanisms are an important consideration when trying to decipher non-  
361 coding effects. Despite reports of gain-of-function variants within existing enhancers in  
362 common disease, rare disease and malignancy<sup>55-57</sup>, we believe this is the first description of  
363 an entirely *de novo* cryptic enhancer causing a Mendelian disorder. Variants creating *de*  
364 *novo* regulatory elements may conceivably be more common than expected. Recently, a  
365 single nucleotide variant which causes  $\alpha$ -thalassemia was fully characterised as generating  
366 a gain-of-function cryptic promoter which blocks interaction between the two  $\alpha$ -globin  
367 encoding genes and their cognate enhancers<sup>58</sup>. Additionally, in T-cell acute lymphoblastic  
368 leukaemia, gain-of-function deletions upstream of the *TAL1* oncogene generate a *de novo*  
369 enhancer which drives higher gene expression<sup>59</sup>. Similarly, in several autosomal dominant  
370 heritable diseases, including brachydactyly-anonychia<sup>60</sup>, Keratolytic Winter Erythema<sup>61</sup>,  
371 Haas-type polysyndactyly and Laurin-Sandrow syndrome<sup>62</sup>, as well as syndactyly and

372 craniosynostosis<sup>63</sup>, duplications of developmental gene enhancers cause disease through  
373 gain-of-function.

374

375 Intriguingly, our 3C approach did not detect significant changes in the interaction between  
376 the *de novo* cryptic enhancer and the *KCNB1* promoter. This suggests that the delinsTCCC  
377 enhancer may function in an indirect manner, by promoting stronger interaction between E-  
378 139 and the *KCNB1* promoter. Recent work to dissect the role of the five independent  
379 elements of the mouse alpha-globin super enhancer has shown that while some elements  
380 look like classical tissue-specific enhancers in reporter assays, they instead act as  
381 facilitators for nearby enhancers in their native context<sup>64</sup>. This is consistent with the tissue-  
382 specific GFP expression driven by the delinsTCCC enhancer in the Zebrafish reporter  
383 assay. This mechanism is compatible with two current models for gene regulation. In the first  
384 model, the loop extrusion model<sup>65</sup>, the delinsTCCC enhancer could be recruiting additional  
385 cohesin<sup>66</sup>, promoting an increase in the frequency of the interaction between *KCNB1* and E-  
386 139. In contrast to this model, the second involves an increase in bound transcription factors  
387 leading to more frequent or stable phase-separation<sup>67</sup>. Further research is required to better  
388 understand these models and their contribution to disease.

389

390 In addition to specific cardiovascular conditions, including cardiac arrhythmias<sup>8</sup>, ischemia or  
391 coronary heart disease<sup>68</sup>, ST-segment depression on the ECG is associated with an  
392 increased risk of unexplained sudden cardiac death in the general population<sup>69</sup>. GWAS have  
393 identified numerous common variants that are associated with ST-segment variability<sup>14</sup>,  
394 some of which are near the delinsTCCC variant. Therefore, additional studies of non-coding  
395 variants associated with ECG alterations from both GWAS and Mendelian disease will likely  
396 improve our general understanding of both gene regulation and cardiovascular disease.

397

398

399 **Acknowledgements**

400 The authors are grateful to Nadav Ahituv from the University of California, San Francisco for  
401 gifting the E1b-GFP-Tol2 vector. We would also like to thank Charlotte Ives, Inherited  
402 Arrhythmia Clinical Nurse Specialist, Barts Health NHS Trust, London, and Ellie Quinn from  
403 Royal Brompton and Harefield Hospitals for assistance with patient records. Additionally, we  
404 would like to thank the Oxford Genomics Centre at the Centre for Human Genetics for the  
405 generation and initial processing of sequencing data.

406

407 This work was supported by funding from the British Heart Foundation (BHF), Wellcome  
408 Trust (nos.090532/Z/09/Z and 203141/Z/16/Z to H.W.) and the National Institute for Health  
409 Research (NIHR) Oxford Biomedical Research Centre. The views expressed are those of  
410 the authors and not necessarily those of the NHS, the NIHR or the Department of Health or  
411 Wellcome Trust. J.R.H received funding from a Wellcome Strategic Award (no.  
412 106130/Z/14/Z), Wellcome Discovery Award (225220/Z/22/Z) and Medical Research Council  
413 Core Funding (no. MC\_UU\_00016/14 and MC\_UU\_00029/3). R.S. was supported by a  
414 Wellcome Doctoral Programme (no. 203728/Z/16/Z). R.A.B was funded by a Sir Henry  
415 Wellcome Fellowship (no. 209181/Z/17/Z). S.D. and S.N. were supported by a BHF  
416 Fellowship (no. FS/1735/32929), MRC project grant (no. MR/S01019X/1) and by Leducq  
417 Foundation grant 18CVD03. P.L. was supported by UCL/UCLH and Barts NIHR Biomedical  
418 Research Centres. H.W.'s laboratory is supported by the British Heart Foundation's Big Beat  
419 Challenge award to CureHeart (BBC/F/21/220106).

420

421

422 **Author contributions**

423 C.P.D.V, D.J.D., A.J.S., S.N., P.R., M.E.G., R.A.B., M.L., C.W., A.T. performed experiments.  
424 C.P.D.V, D.J.D., A.T.P., A.J.S., S.N., E.G., A.G., M.F., R.S., D.P., S.L, S.S, H.R. processed  
425 data and performed analyses.

426 C.P.D.V, D.J.D. designed experiments.

427 C.P.D.V., D.J.D., A.T.P., A.J.S., S.N, E.G., A.G., M.F., P.R, D.P. wrote the manuscript and  
428 made figures.

429 E.O., R.H., E.R., G.S, P.L., H.W. collected and evaluated clinical data.

430 C.P.D.V, A.J.S. cultured iPSC derived cardiomyocytes.

431 S.N. performed zebrafish investigations.

432 P.R. produced CRISPR-Cas9 edited iPSC cell lines.  
433 M.L, C.W., A.T. performed nanopore sequencing.  
434 M.F., B.D., D.B., J.C.T., C.R., S.D.V., J.R.H., H.W. provided supervision.  
435 H.W., J.R.H., acquired funding, oversaw the work, and revised the manuscript.  
436 H.W. conceived the work.

437

438 **Disclosures**

439 J.R.H. is a founder, shareholder and director of Nucleome Therapeutics.  
440 J.R.H. holds patents for Capture-C (nos. WO2017068379A1, EP3365464B1  
441 and US10934578B2).  
442 R.H. is currently employed at Novartis and has stock ownership for AstraZeneca and  
443 Illumina  
444 D.J.D. is currently employed by Blue Matter Consulting  
445 R.S is currently employed by Glaxo-Smith Klein  
446 The other authors declare no competing interests.

447 **Figures**

448

449

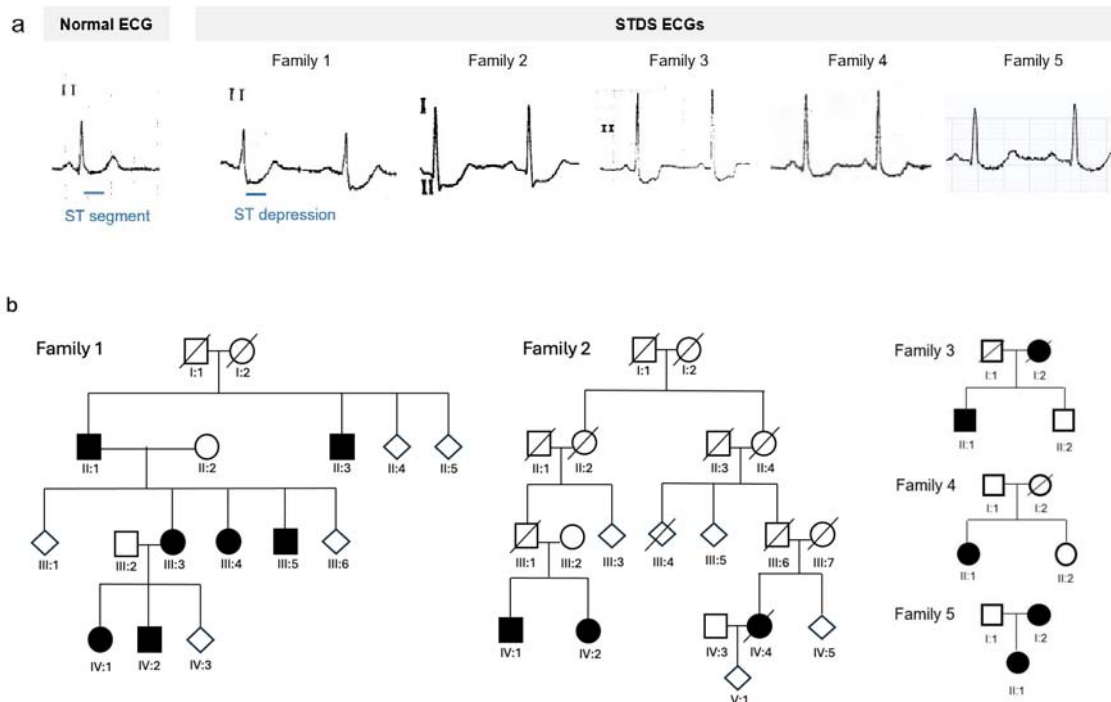

451

452

453 **Fig. 1. Families with ST-depression syndrome (STDS).** **a**, Example ECG lead II traces  
454 showing normal versus ST-segment depression in affected members from five independent  
455 UK families. **b**, Partial pedigrees of families identified with STDS. Affected individuals are  
456 shaded in black. The full pedigrees have not been disclosed to comply with medRxiv's  
457 policies. Full disclosure of the pedigrees is available upon request from the authors.



458

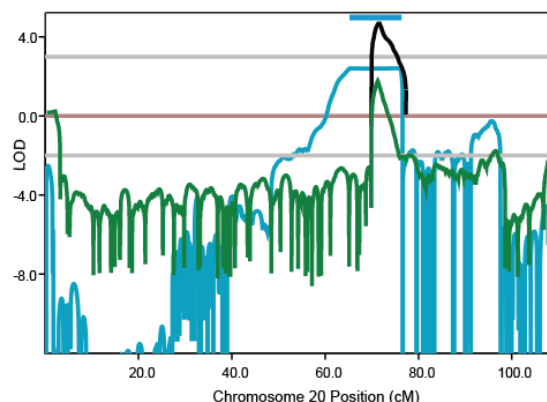

459

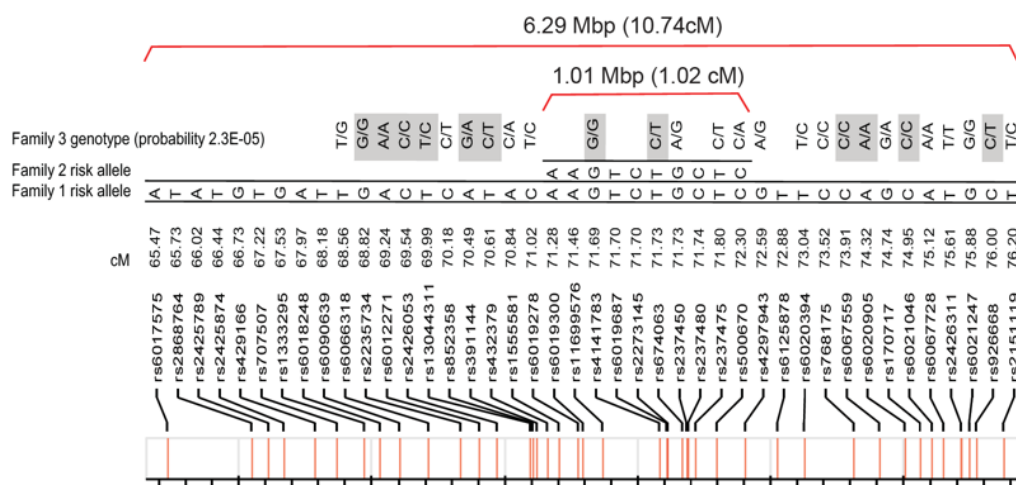

460

461

462

463

464

465

466

467

468

469

470

471

472

**Fig. 2. A shared, identical-by-descent, disease locus on chromosome 20. a,** Linkage analysis identified a single linkage region shared by family 1 (blue) and family 2 (green) on chromosome 20. The blue bar denotes the 6.29Mbp region in complete linkage in Family 1 and is displayed in b). **b)** 3-4 markers were selected per cM and the linkage boundaries were determined based on recombination events. The risk haplotypes of families 1 & 2 are shown and are seen to be identical in a ~1Mbp region; as the haplotype is rare this indicates identity-by-descent, allowing combining of the LOD scores (black). Genotypes of the affected family 3 member are shown above; SNPs in linkage with each other are highlighted in grey and excluded from probability estimation for Family 3.

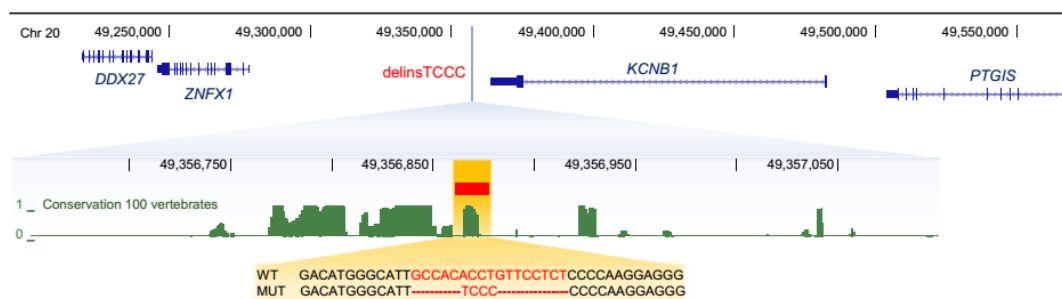

473  
474  
475  
476  
477

**Fig. 3. The delinsTCCC variant and flanking sequence.** Sequence and relative chromosome 20 position (hg38) of the indel variant. Green conservation peaks represent PhastCons conservation predictions using 100 vertebrates.

478

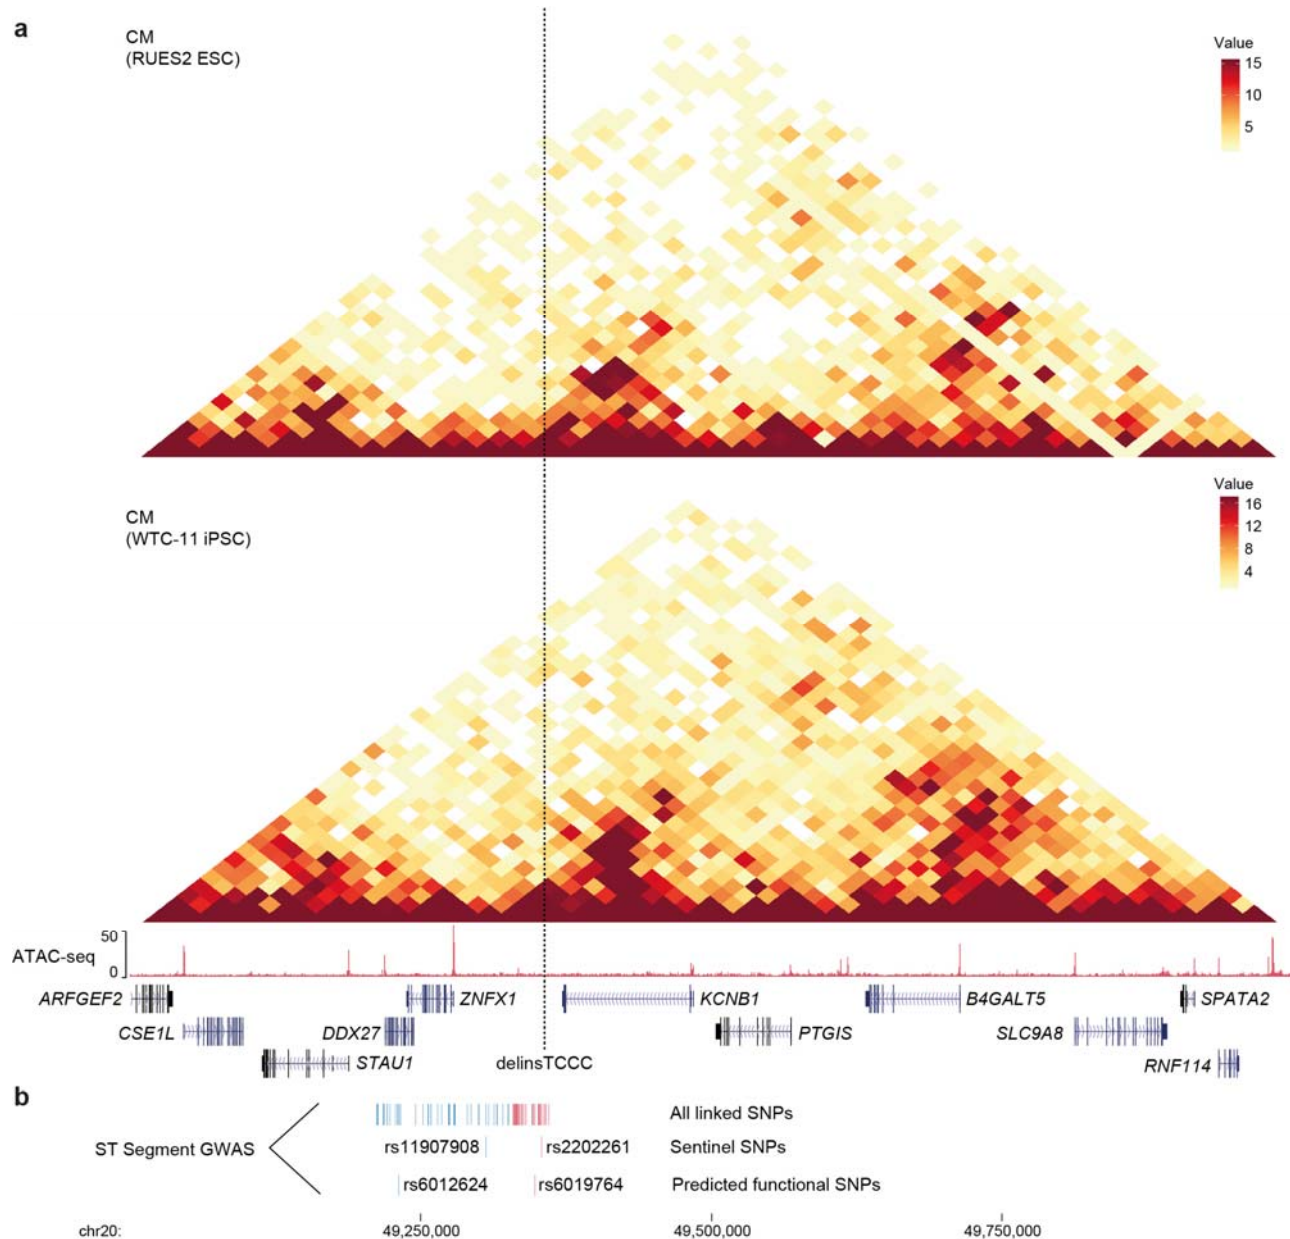

479

480

481 **Fig. 4. *In silico* analysis of the novel delinsTCCC variant and flanking sequence. a,** HiC

482 interaction plots for ESC and iPSC derived cardiomyocytes, ATAC-seq peaks for iPSC

483 derived cardiomyocytes, genes and delinsTCCC location. **b,** SNPs in linkage ( $r^2 \geq 0.8$  [EUR])

484 with ST-segment GWAS sentinel SNPs rs11907908 (blue) and rs2202261 (red).

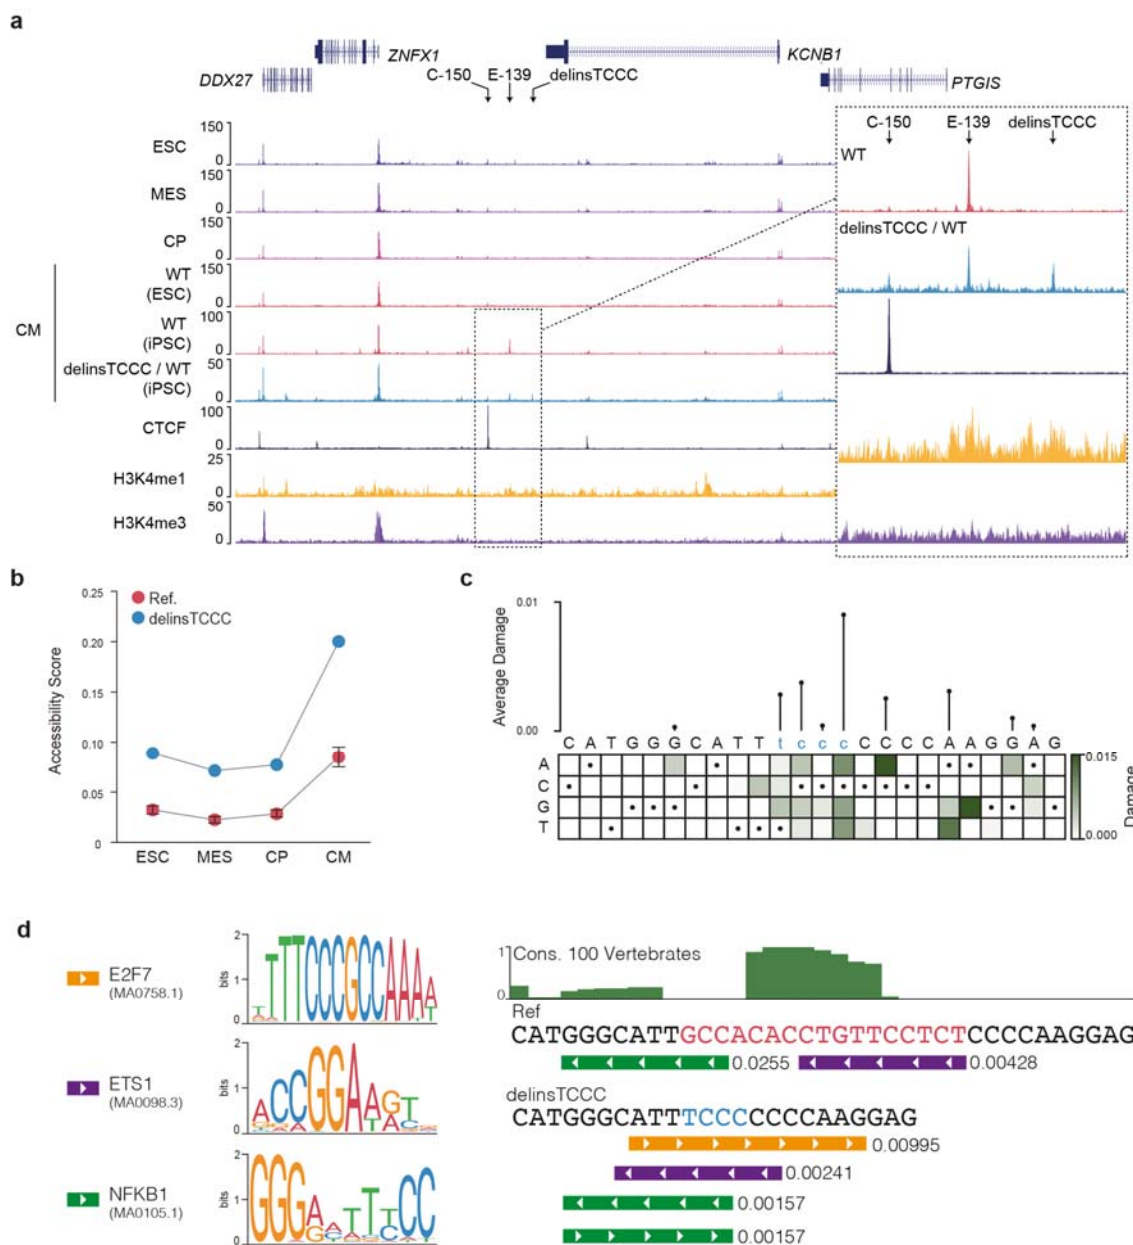

485  
486  
487  
488  
489  
490  
491  
492  
493  
494  
495  
496  
497

**Fig. 5. Accessibility analysis of the delinsTCCC variant sequence.** **a**, ATAC sequencing analysis of published data (GSE89895, GSE106690) for cardiomyocytes (CM) and progenitors, including mesoderm (MES) and cardiac progenitors (CP), derived from differentiation of embryonic stem cells (ESC), or induced pluripotent stem cells (iPSC). Cardiomyocytes either lacked (WT) or were heterozygous (delinsTCCC/WT) for the delinsTCCC variant. CTCF ChIP-seq (Erythroid, GSE125926) shows tissue-invariant boundary elements. H3K4me1 and H4K4me3 CUT&RUN in delinsTCCC heterozygous cardiomyocytes show enhancers and promoters respectively. Inset region is chr20:49,327,000-49,367,000 (hg38) with 5-pixel window. **b**, deep CNN accessibility predictions. Error bars denote one standard deviation of accessibility score for the 13 possible 1 kbp sequences covering the indel site. **c**, *in silico* mutagenesis for the

498 delinsTCCC site indicating a possible motif including the TCCC insert. **d**, left panel shows  
499 the colour coded FIMO derived predicted motifs from both the reference and variant  
500 delinsTCCC sequence. The right panel shows the PhyloP sequence conservation plotted  
501 over the reference sequence (Ref) with the deleted sequence high-lighted in red and with  
502 the position of motif matches and FIMO p-values below. The delinsTCCC variant sequence  
503 is shown below with the 4 base-pair insertion highted in blue and with the position of motif  
504 matches and FIMO p-values below, showing the creation of a strong E2F7 motif and the  
505 rearrangement and increase in scores for pre-existing motifs.

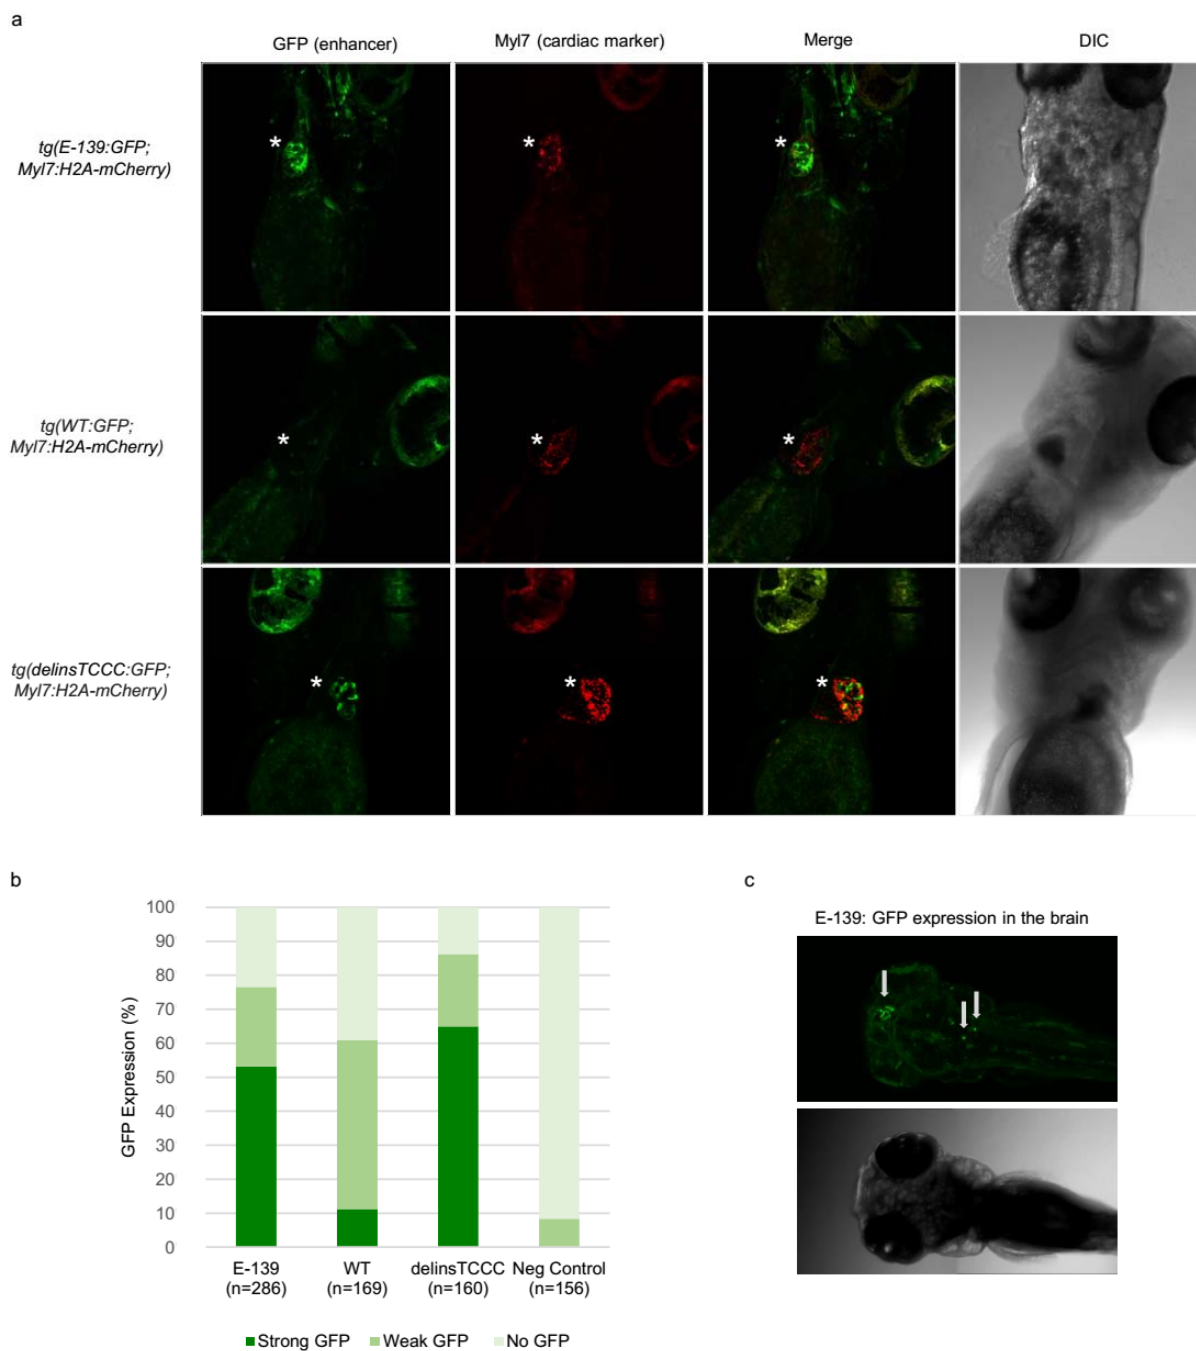

506

507 **Fig. 6. Enhancer variant expression in zebrafish embryos.** **a**, GFP expression for  
508 transgenic fish containing the E-139, wild type (WT) or delinsTCCC variant sequence. The  
509 asterisk indicates the location of the heart. The Myl7 cardiac marker is overlaid in red. DIC =  
510 differential interference contrast. **b**, Total GFP levels observed in the hearts of transgenic  
511 zebrafish; n represents the total number of transgenic zebrafish embryos per category. **c**, E-  
512 139 transgenic fish displayed strong expression in the brain indicated by the arrows.

513  
514

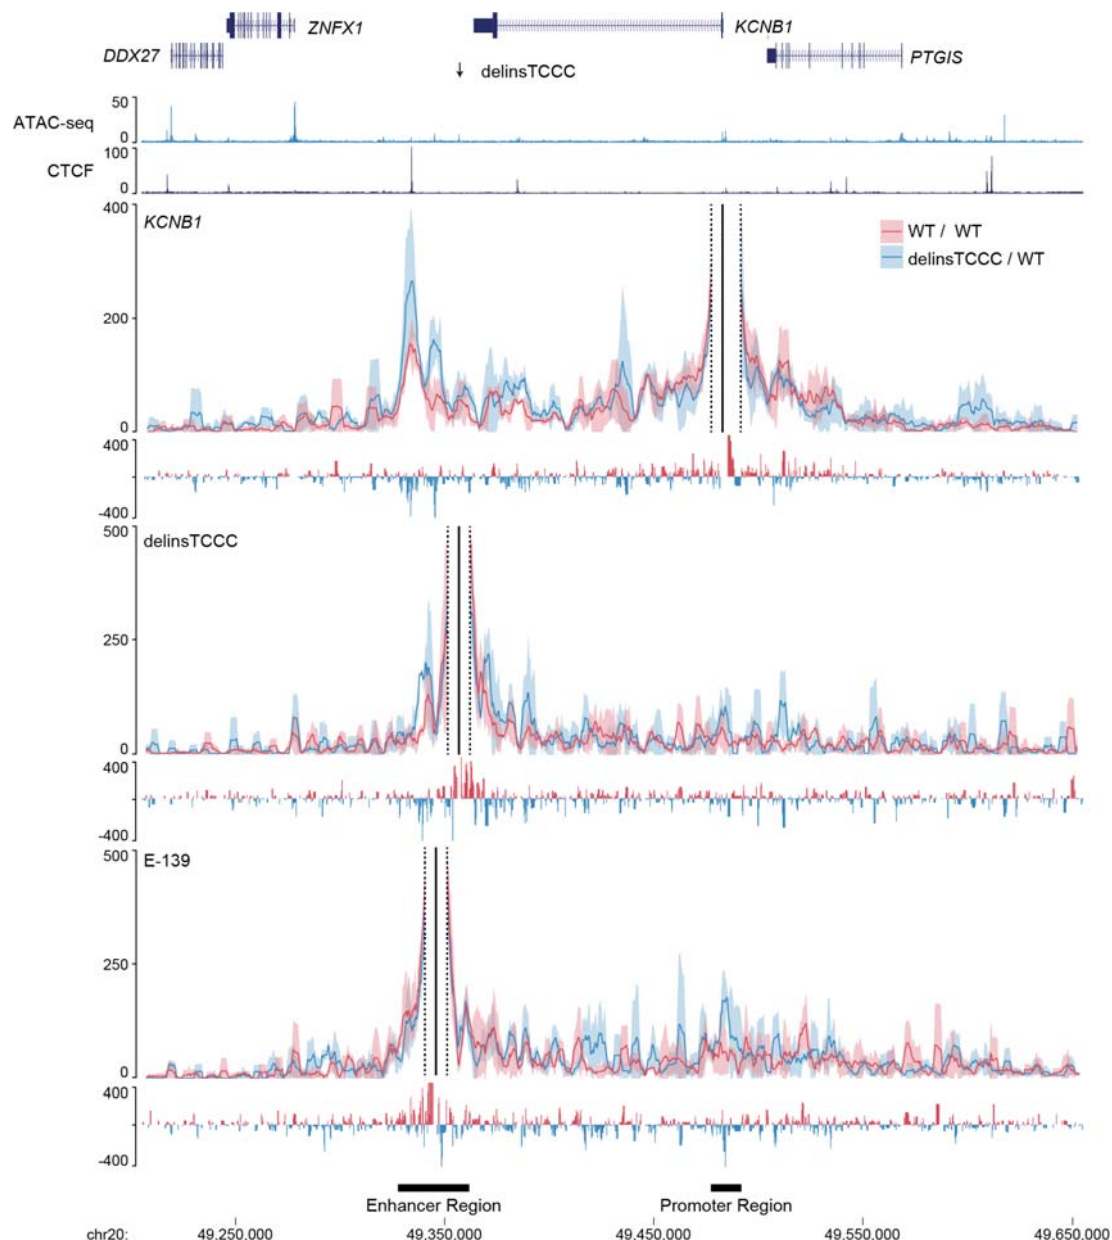

515  
516  
517  
518  
519  
520  
521  
522  
523

**Fig. 7. Chromatin conformation and interaction assays.** ATAC sequencing analysis of experimental data from iPSC derived cardiomyocytes (CM) heterozygous (delinsTCCC/WT) for the delinsTCCC variant. CTCF ChIP-seq shows boundary elements. Capture-C from the *KCNB1* promoter, delinsTCCC enhancer, and the E-139 enhancer. Solid lines show mean (n=3 independent samples) with one standard deviation (shading). Subtraction tracks show per *DpnII* fragment difference. Enhancer and promoter regions indicated below display regions of significant difference.

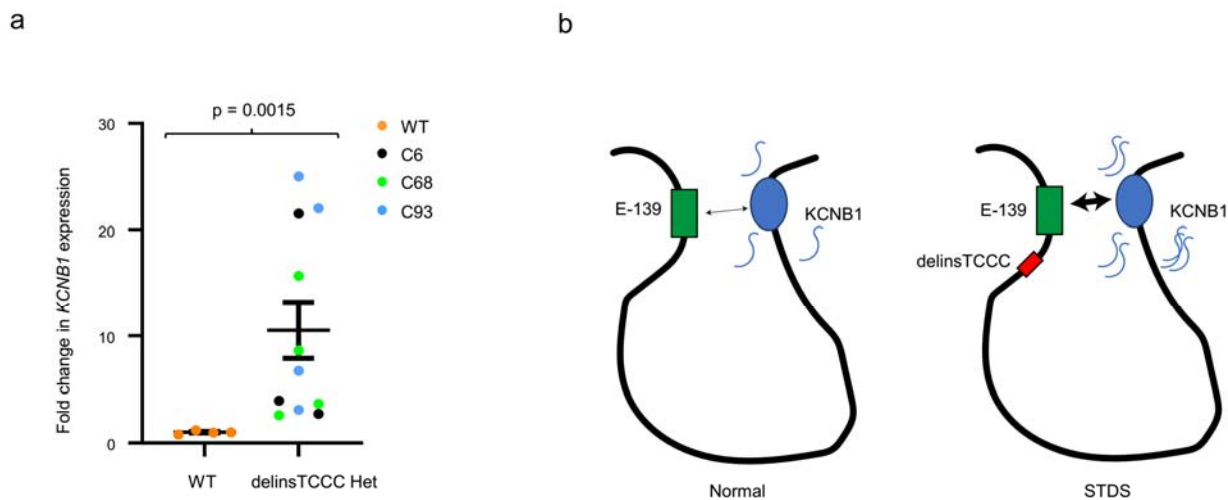

524

525

**Fig. 8. *KCNB1* upregulation by the delinsTCCC variant.** **a**, Fold change in *KCNB1* expression versus the housekeeping gene (*GAPDH*) detected by qPCR for reference (WT n=4 independent samples/differentiations) and heterozygous delinsTCCC clones (C6 n=3, C68 n=4, C93 n=4 independent samples/differentiations). The mean for each group is represented by the black horizontal line, bars show standard error of the mean and the p-value from two-sided Mann-Whitney test is indicated. **b**, Model illustrating a proposed regulatory mechanism with the delinsTCCC variant indirectly enhancing *KCNB1* transcription.

532



533 **References**

- 534 1. Taylor, J. C. *et al.* Factors influencing success of clinical genome sequencing across a  
535 broad spectrum of disorders. *Nat. Genet.* **47**, 717–726 (2015).
- 536 2. Trujillano, D. *et al.* Clinical exome sequencing: results from 2819 samples reflecting 1000  
537 families. *Eur. J. Hum. Genet.* **25**, 176–182 (2017).
- 538 3. Wright, C. F., FitzPatrick, D. R. & Firth, H. V. Paediatric genomics: diagnosing rare disease  
539 in children. *Nat. Rev. Genet.* **19**, 253–268 (2018).
- 540 4. Lee, H. *et al.* Diagnostic utility of transcriptome sequencing for rare Mendelian diseases.  
541 *Genet. Med.* **22**, 490–499 (2020).
- 542 5. Gloss, B. S. & Dinger, M. E. Realizing the significance of noncoding functionality in  
543 clinical genomics. *Exp. Mol. Med.* **50**, 97 (2018).
- 544 6. Maurano, M. T. *et al.* Systematic localization of common disease-associated variation in  
545 regulatory DNA. *Science* **337**, 1190–1195 (2012).
- 546 7. French, J. D. & Edwards, S. L. The Role of Noncoding Variants in Heritable Disease.  
547 *Trends Genet.* **36**, 880–891 (2020).
- 548 8. Bundgaard, H. *et al.* A novel familial cardiac arrhythmia syndrome with widespread ST-  
549 segment depression. *N. Engl. J. Med.* **379**, 1780–1781 (2018).
- 550 9. Christensen, A. H. & Bundgaard, H. The Novel Familial ST-Depression Syndrome -  
551 Current Knowledge and Perspectives. *Card. Electrophysiol. Clin.* **15**, 343–348 (2023).
- 552 10. Ntalla, I. *et al.* Multi-ancestry GWAS of the electrocardiographic PR interval identifies  
553 202 loci underlying cardiac conduction. *Nat. Commun.* **11**, 1–12 (2020).
- 554 11. Sotoodehnia, N. *et al.* Common variants in 22 loci are associated with QRS duration and  
555 cardiac ventricular conduction. *Nat. Genet.* **42**, 1068–1076 (2010).

- 556 12. Newton-Cheh, C. *et al.* Common variants at ten loci influence QT interval duration in the  
557 QTGEN Study. *Nat. Genet.* **41**, 399–406 (2009).
- 558 13. Pfeufer, A. *et al.* Common variants at ten loci modulate the QT interval duration in the  
559 QTSCD Study. *Nat. Genet.* **41**, 407–414 (2009).
- 560 14. Verweij, N. *et al.* Twenty-eight genetic loci associated with ST-T-wave amplitudes of the  
561 electrocardiogram. *Hum. Mol. Genet.* **25**, 2093–2103 (2016).
- 562 15. Downes, D. J. *et al.* An integrated platform to systematically identify causal variants and  
563 genes for polygenic human traits. *Prepr. BioRxiv* <https://doi.org/10.1101/813618> (2019).
- 564 16. Downes, D. J. *et al.* Identification of LZTFL1 as a candidate effector gene at a COVID-19  
565 risk locus. *Nat. Genet.* **53**, 1606–1615 (2021).
- 566 17. Rimmer, A. *et al.* Integrating mapping-, assembly-and haplotype-based approaches for  
567 calling variants in clinical sequencing applications. *Nat. Genet.* **46**, 912–918 (2014).
- 568 18. Schwessinger, R. *et al.* DeepC: predicting 3D genome folding using megabase-scale  
569 transfer learning. *Nat. Methods* 1–7 (2020).
- 570 19. Bertero, A. *et al.* Dynamics of genome reorganization during human cardiogenesis reveal  
571 an RBM20-dependent splicing factory. *Nat. Commun.* **10**, 1–19 (2019).
- 572 20. Banovich, N. E. *et al.* Impact of regulatory variation across human iPSCs and  
573 differentiated cells. *Genome Res.* **28**, 122–131 (2018).
- 574 21. Domcke, S. *et al.* A human cell atlas of fetal chromatin accessibility. *Science* **370**,  
575 eaba7612 (2020).
- 576 22. ENCODE Project Consortium. An integrated encyclopedia of DNA elements in the human  
577 genome. *Nature* **489**, 57–74 (2012).

- 578 23. ENCODE Project Consortium *et al.* Expanded encyclopaedias of DNA elements in the  
579 human and mouse genomes. *Nature* **583**, 699–710 (2020).
- 580 24. Farley, E. K. *et al.* Suboptimization of developmental enhancers. *Science* **350**, 325–328  
581 (2015).
- 582 25. Jindal, G. A. *et al.* Single-nucleotide variants within heart enhancers increase binding  
583 affinity and disrupt heart development. *Dev. Cell* **58**, 2206-2216.e5 (2023).
- 584 26. Kowalczyk, M. S. *et al.* Intragenic Enhancers Act as Alternative Promoters. *Mol. Cell* **45**,  
585 447–458 (2012).
- 586 27. Skene, P. J. & Henikoff, S. An efficient targeted nuclease strategy for high-resolution  
587 mapping of DNA binding sites. *eLife* **6**, e21856 (2017).
- 588 28. Murakoshi, H. & Trimmer, J. S. Identification of the Kv2.1 K<sup>+</sup> Channel as a Major  
589 Component of the Delayed Rectifier K<sup>+</sup> Current in Rat Hippocampal Neurons. *J.*  
590 *Neurosci.* **19**, 1728–1735 (1999).
- 591 29. Downes, D. J. *et al.* High-resolution targeted 3C interrogation of cis -regulatory element  
592 organization at genome-wide scale. *Nat. Commun.* **12**, 531 (2021).
- 593 30. Christensen, A. H. *et al.* Electrocardiographic Findings, Arrhythmias, and Left Ventricular  
594 Involvement in Familial ST-Depression Syndrome. *Circ. Arrhythm. Electrophysiol.* **15**,  
595 e010688 (2022).
- 596 31. Hedley, P. L. *et al.* The genetic basis of long QT and short QT syndromes: A mutation  
597 update. *Hum. Mutat.* **30**, 1486–1511 (2009).
- 598 32. Xu, H. *et al.* Attenuation of the slow component of delayed rectification, action potential  
599 prolongation, and triggered activity in mice expressing a dominant-negative Kv2  $\alpha$   
600 subunit. *Circ. Res.* **85**, 623–633 (1999).

- 601 33. Zhou, J. *et al.* Regional upregulation of Kv2. 1-encoded current, IK, slow2, in Kv1DN mice  
602 is abolished by crossbreeding with Kv2DN mice. *Am. J. Physiol.-Heart Circ. Physiol.* **284**,  
603 H491–H500 (2003).
- 604 34. Van Wagoner, D. R., Pond, A. L., McCarthy, P. M., Trimmer, J. S. & Nerbonne, J. M.  
605 Outward K<sup>+</sup> current densities and Kv1. 5 expression are reduced in chronic human atrial  
606 fibrillation. *Circ. Res.* **80**, 772–781 (1997).
- 607 35. Gaborit, N. *et al.* Regional and tissue specific transcript signatures of ion channel genes  
608 in the non-diseased human heart. *J. Physiol.* **582**, 675–693 (2007).
- 609 36. Ördög, B. *et al.* Gene expression profiling of human cardiac potassium and sodium  
610 channels. *Int. J. Cardiol.* **111**, 386–393 (2006).
- 611 37. McCrossan, Z. A., Roepke, T. K., Lewis, A., Panaghie, G. & Abbott, G. W. Regulation of the  
612 Kv2. 1 potassium channel by MinK and MiRP1. *J. Membr. Biol.* **228**, 1–14 (2009).
- 613 38. Splawski, I., Tristani-Firouzi, M., Lehmann, M. H., Sanguinetti, M. C. & Keating, M. T.  
614 Mutations in the hminK gene cause long QT syndrome and suppress IKs function. *Nat.*  
615 *Genet.* **17**, 338–340 (1997).
- 616 39. Abbott, G. W. *et al.* MiRP1 Forms IKr Potassium Channels with HERG and Is Associated  
617 with Cardiac Arrhythmia. *Cell* **97**, 175–187 (1999).
- 618 40. Kang, S. K. *et al.* Spectrum of KV2.1 Dysfunction in KCNB1-Associated  
619 Neurodevelopmental Disorders. *Ann. Neurol.* **86**, 899–912 (2019).
- 620 41. Trimmer, J. S. Subcellular Localization of K<sup>+</sup> Channels in Mammalian Brain Neurons:  
621 Remarkable Precision in the Midst of Extraordinary Complexity. *Neuron* **85**, 238–256  
622 (2015).

- 623 42. Hopenfled, B., Stinstra, J. G. & Macleod, R. S. Mechanism for ST depression associated  
624 with contiguous subendocardial ischemia. *J. Cardiovasc. Electrophysiol.* **15**, 1200–1206  
625 (2004).
- 626 43. Okada, J.-I. *et al.* Ionic mechanisms of ST segment elevation in electrocardiogram during  
627 acute myocardial infarction. *J. Physiol. Sci. JPS* **70**, 36 (2020).
- 628 44. Schram, G., Pourrier, M., Melnyk, P. & Nattel, S. Differential Distribution of Cardiac Ion  
629 Channel Expression as a Basis for Regional Specialization in Electrical Function. *Circ. Res.*  
630 **90**, 939–950 (2002).
- 631 45. Bhar-Amato, J. *et al.* Pharmacological Modulation of Right Ventricular Endocardial-  
632 Epicardial Gradients in Brugada Syndrome. *Circ. Arrhythm. Electrophysiol.* **11**, e006330  
633 (2018).
- 634 46. Antzelevitch, C. The Brugada syndrome: ionic basis and arrhythmia mechanisms. *J.*  
635 *Cardiovasc. Electrophysiol.* **12**, 268–272 (2001).
- 636 47. Yan, G.-X., Lankipalli, R. S., Burke, J. F., Musco, S. & Kowey, P. R. Ventricular  
637 repolarization components on the electrocardiogram: cellular basis and clinical  
638 significance. *J. Am. Coll. Cardiol.* **42**, 401–409 (2003).
- 639 48. Kapoor, A. *et al.* An enhancer polymorphism at the cardiomyocyte intercalated disc  
640 protein NOS1AP locus is a major regulator of the QT interval. *Am. J. Hum. Genet.* **94**,  
641 854–869 (2014).
- 642 49. Kapoor, A. *et al.* Multiple SCN5A variant enhancers modulate its cardiac gene expression  
643 and the QT interval. *Proc. Natl. Acad. Sci.* **116**, 10636–10645 (2019).
- 644 50. De Villiers, C. P. *et al.* AKAP9 is a genetic modifier of congenital long-QT syndrome type  
645 1. *Circ. Cardiovasc. Genet.* **7**, 599–606 (2014).

- 646 51. Holm, H. *et al.* Several common variants modulate heart rate, PR interval and QRS  
647 duration. *Nat. Genet.* **42**, 117 (2010).
- 648 52. Bezzina, C. R. *et al.* Common Sodium Channel Promoter Haplotype in Asian Subjects  
649 Underlies Variability in Cardiac Conduction. *Circulation* **113**, 338–344 (2006).
- 650 53. van Weerd, J. H. *et al.* Trait-associated noncoding variant regions affect TBX3 regulation  
651 and cardiac conduction. *eLife* **9**, e56697 (2020).
- 652 54. Davies, J. O. J., Oudelaar, A. M., Higgs, D. R. & Hughes, J. R. How best to identify  
653 chromosomal interactions: a comparison of approaches. *Nat. Methods* **14**, 125–134  
654 (2017).
- 655 55. Gupta, R. M. *et al.* A Genetic Variant Associated with Five Vascular Diseases Is a Distal  
656 Regulator of Endothelin-1 Gene Expression. *Cell* **170**, 522-533.e15 (2017).
- 657 56. Mika, K. M., Li, X., DeMayo, F. J. & Lynch, V. J. An Ancient Fecundability-Associated  
658 Polymorphism Creates a GATA2 Binding Site in a Distal Enhancer of HLA-F. *Am. J. Hum.*  
659 *Genet.* **103**, 509–521 (2018).
- 660 57. Wright, J. B., Brown, S. J. & Cole, M. D. Upregulation of c-MYC in cis through a Large  
661 Chromatin Loop Linked to a Cancer Risk-Associated Single-Nucleotide Polymorphism in  
662 Colorectal Cancer Cells. *Mol. Cell. Biol.* **30**, 1411–1420 (2010).
- 663 58. Bozhilov, Y. K. *et al.* A gain-of-function single nucleotide variant creates a new promoter  
664 which acts as an orientation-dependent enhancer-blocker. *Nat. Commun.* **12**, 3806  
665 (2021).
- 666 59. Mansour, M. R. *et al.* An oncogenic super-enhancer formed through somatic mutation  
667 of a noncoding intergenic element. *Science* **346**, 1373–1377 (2014).

- 668 60. Kurth, I. *et al.* Duplications of noncoding elements 5' of SOX9 are associated with  
669 brachydactyly-anonychia. *Nat. Genet.* **41**, 862–863 (2009).
- 670 61. Ngcungcu, T. *et al.* Duplicated Enhancer Region Increases Expression of CTSB and  
671 Segregates with Keratolytic Winter Erythema in South African and Norwegian Families.  
672 *Am. J. Hum. Genet.* **100**, 737–750 (2017).
- 673 62. Lohan, S. *et al.* Microduplications encompassing the Sonic hedgehog limb enhancer ZRS  
674 are associated with Haas-type polysyndactyly and Laurin-Sandrow syndrome. *Clin.*  
675 *Genet.* **86**, 318–325 (2014).
- 676 63. Will, A. J. *et al.* Composition and dosage of a multipartite enhancer cluster control  
677 developmental expression of *Ihh* (Indian hedgehog). *Nat. Genet.* **49**, 1539–1545 (2017).
- 678 64. Blayney, J. W. *et al.* Super-enhancers include classical enhancers and facilitators to fully  
679 activate gene expression. *Cell* **186**, 5826–5839.e18 (2023).
- 680 65. Fudenberg, G. *et al.* Formation of Chromosomal Domains by Loop Extrusion. *Cell Rep.*  
681 **15**, 2038–2049 (2016).
- 682 66. Rinzema, N. J. *et al.* *Building Regulatory Landscapes: Enhancer Recruits Cohesin to*  
683 *Create Contact Domains, Engage CTCF Sites and Activate Distant Genes.*  
684 2021.10.05.463209 <https://www.biorxiv.org/content/10.1101/2021.10.05.463209v1>  
685 (2021) doi:10.1101/2021.10.05.463209.
- 686 67. Hnisz, D., Shrinivas, K., Young, R. A., Chakraborty, A. K. & Sharp, P. A. A Phase Separation  
687 Model for Transcriptional Control. *Cell* **169**, 13–23 (2017).
- 688 68. Hanna, E. B. & Glancy, D. L. ST-segment depression and T-wave inversion: Classification,  
689 differential diagnosis, and caveats. *Cleve. Clin. J. Med.* **78**, 404–414 (2011).

690 69. Deng, X.-Q., Xu, X.-J., Wu, S.-H., Li, H. & Cheng, Y.-J. Association between resting painless  
691 ST-segment depression with sudden cardiac death in middle-aged population: A  
692 prospective cohort study. *Int. J. Cardiol.* **301**, 1–6 (2020).

693

694

695 **WGS500 Consortium membership: names and affiliations of authors**

696 Steering Committee: Peter Donnelly (Chair)<sup>1</sup>, John Bell<sup>2</sup>, David Bentley<sup>3</sup>, Gil McVean<sup>1</sup>,  
697 Peter Ratcliffe<sup>1</sup>, Jenny C. Taylor<sup>1,4</sup>, Andrew Wilkie<sup>4,5</sup>

698 Operations Committee: Peter Donnelly (Chair)<sup>1</sup>, John Broxholme<sup>1</sup>, David Buck<sup>1</sup>, Jean-  
699 Baptiste Cazier<sup>1</sup>, Richard Cornall<sup>1</sup>, Lorna Gregory<sup>1</sup>, Julian Knight<sup>1</sup>, Gerton Lunter<sup>1</sup>, Gil  
700 McVean<sup>1</sup>, Jenny C. Taylor<sup>1,4</sup>, Ian Tomlinson<sup>1,4</sup>, Andrew Wilkie<sup>4,5</sup>

701 Sequencing & Experimental Follow up: David Buck (Lead)<sup>1</sup>, Christopher Allan<sup>1</sup>, Moustafa  
702 Attar<sup>1</sup>, Angie Green<sup>1</sup>, Lorna Gregory<sup>1</sup>, Sean Humphray<sup>3</sup>, Zoya Kingsbury<sup>3</sup>, Sarah Lambie<sup>1</sup>,  
703 Lorne Lonie<sup>1</sup>, Alistair T. Pagnamenta<sup>1</sup>, Paolo Piazza<sup>1</sup>, Guadalupe Polanco<sup>1</sup>, Amy Trebes<sup>1</sup>

704 Data Analysis: Gil McVean<sup>1</sup> (Lead), Peter Donnelly<sup>1</sup>, Jean-Baptiste Cazier<sup>1</sup>, John  
705 Broxholme<sup>1</sup>, Richard Copley<sup>1</sup>, Simon Fiddy<sup>1</sup>, Russell Grocock<sup>3</sup>, Edouard Hatton<sup>1</sup>, Chris  
706 Holmes<sup>1</sup>, Linda Hughes<sup>1</sup>, Peter Humburg<sup>1</sup>, Alexander Kanapin<sup>1</sup>, Stefano Lise<sup>1</sup>, Gerton  
707 Lunter<sup>1</sup>, Hilary C. Martin<sup>1</sup>, Lisa Murray<sup>3</sup>, Davis McCarthy<sup>1</sup>, Andy Rimmer<sup>1</sup>, Natasha  
708 Sahgal<sup>1</sup>, Ben Wright<sup>1</sup>, Chris Yau<sup>6</sup>

709

710 <sup>1</sup>The Centre for Human Genetics, Roosevelt Drive, Oxford, OX3 7BN, UK

711 <sup>2</sup>Office of the Regius Professor of Medicine, Richard Doll Building, Roosevelt Drive,  
712 Oxford, OX3 7LF, UK

713 <sup>3</sup>Illumina Cambridge Ltd., Chesterford Research Park, Little Chesterford, Essex, CB10 1XL,  
714 UK

715 <sup>4</sup>NIHR Oxford Biomedical Research Centre, Oxford, UK

716 <sup>5</sup>Weatherall Institute of Molecular Medicine, John Radcliffe Hospital, Headington, Oxford  
717 OX3 9DS, UK

718 <sup>6</sup>Imperial College London, South Kensington Campus, London, SW7 2AZ, UK
